# Supplementary material for: Trimetallic PdCuIr with long-spined sea-urchin-like morphology for ambient electroreduction of nitrogen to ammonia
Source: Royal Society of Chemistry journal article supplement (doi:10.1039/c8ta10562f), 2019-01-01
Supplement: c8ta10562f1.pdf [file c8ta10562f1.pdf]

Electronic Supplementary Information for

**Trimetallic PdCuIr with long-spined sea-urchin-like morphology for ambient electroreduction of nitrogen to ammonia**

Rajaiah Dhilip Kumar,<sup>‡</sup> Ziqiang Wang,<sup>‡</sup> Chunjie Li, Alam Venugopal Narendra Kumar, Hairong Xue, You Xu, Xiaonian Li, Liang Wang\* and Hongjing Wang\*

State Key Laboratory Breeding Base of Green-Chemical Synthesis Technology, College of Chemical Engineering, Zhejiang University of Technology, Hangzhou 310014, P. R. China.

\*Corresponding authors' E-mails: wangliang@zjut.edu.cn; hjw@zjut.edu.cn.

<sup>‡</sup> Rajaiah Dhilip Kumar and Ziqiang Wang have made equal contribution to this paper.

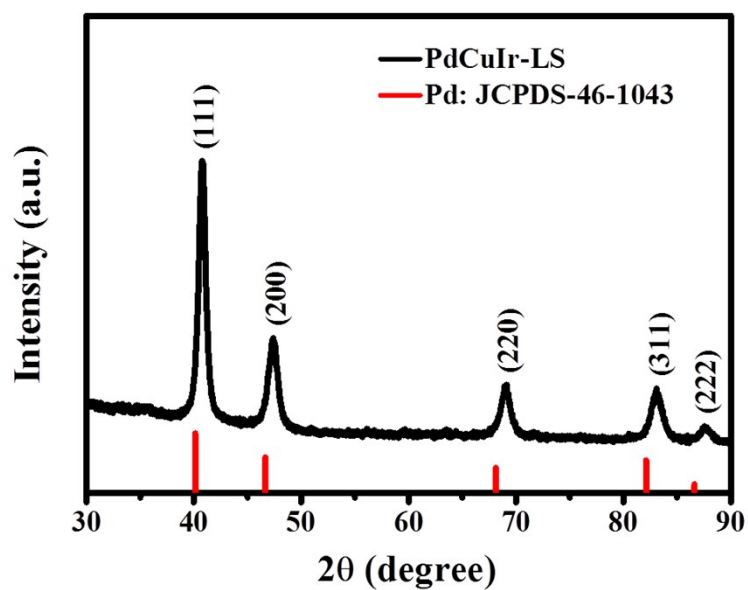

**Fig. S1** XRD pattern of the PdCuIr-LS.

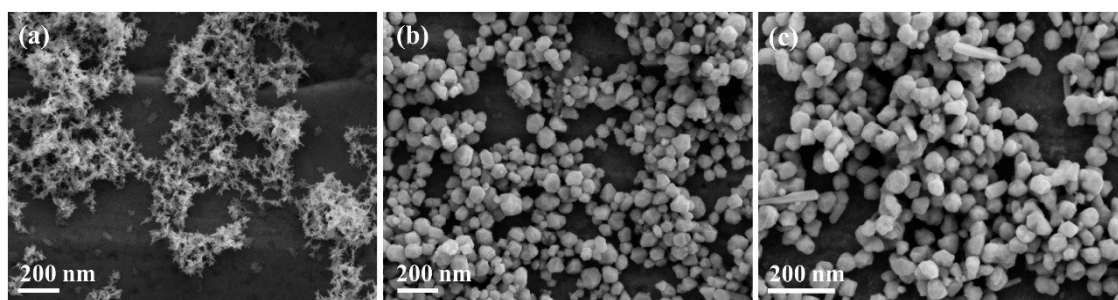

**Fig. S2** SEM images of the samples prepared with different precursors under the identical conditions: (a) PdCu, (b) PdIr and (c) Pd nanoparticles.

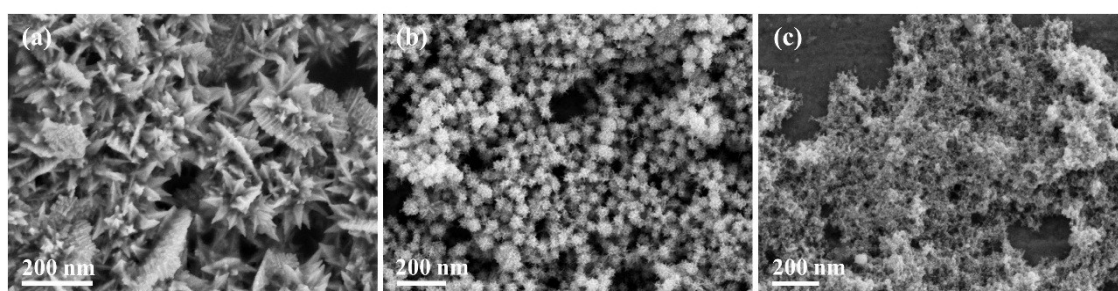

**Fig. S3** SEM images of the samples prepared without (a) F127, (b) KBr and (c) HCl under the identical conditions.

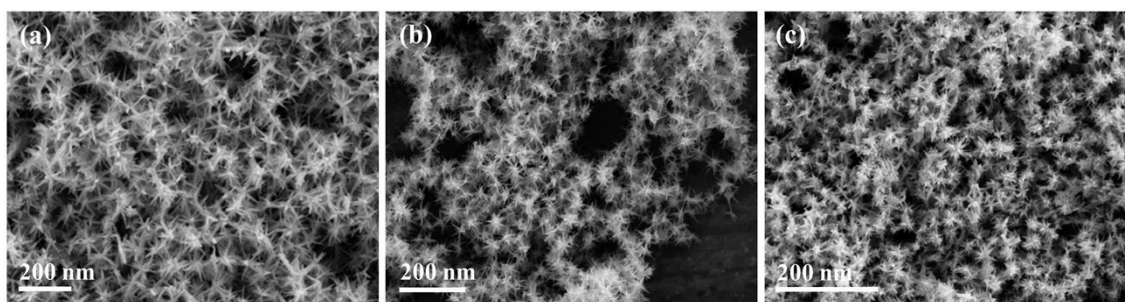

**Fig. S4** SEM images of the PdCuIr samples prepared with different amounts of metallic precursors under the identical conditions: (a)  $\text{Na}_2\text{PdCl}_4$  (2.5 mL, 20 mM),  $\text{CuCl}_2$  (1.0 mL, 20 mM),  $\text{IrCl}_3$  (1.0 mL, 20 mM); (b)  $\text{Na}_2\text{PdCl}_4$  (1.5 mL, 20 mM),  $\text{CuCl}_2$  (1.5 mL, 20 mM),  $\text{IrCl}_3$  (1.5 mL, 20 mM); (c)  $\text{Na}_2\text{PdCl}_4$  (3.0 mL, 20 mM),  $\text{CuCl}_2$  (0.75 mL, 20 mM),  $\text{IrCl}_3$  (0.75 mL, 20 mM).

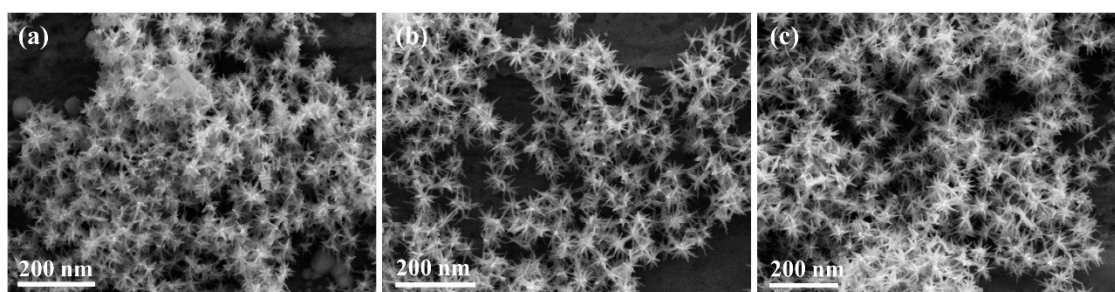

**Fig. S5** SEM images of the PdCuIr alloys prepared at different reaction times: (a) 15 min, (b) 60 min and (c) 90 min.

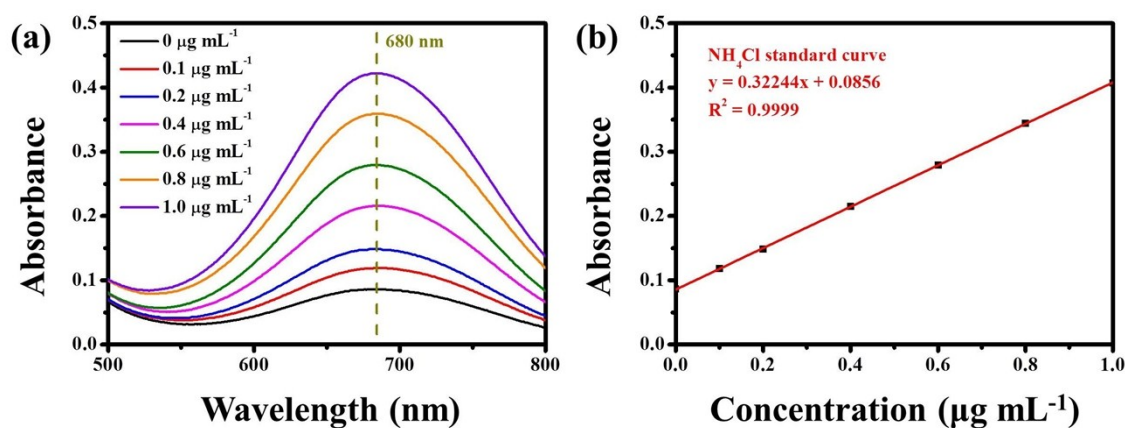

**Fig. S6** (a) UV-vis absorption spectra of standard  $\text{NH}_4\text{Cl}$  solution colored with indophenol assays for 2 h at room temperature. (b) The linear relationship between maximum absorbance at  $\lambda = 680$  nm and concentrations of  $\text{NH}_4\text{Cl}$  solution ( $y = 0.32244x + 0.0856$ ,  $R^2 = 0.9999$ ).

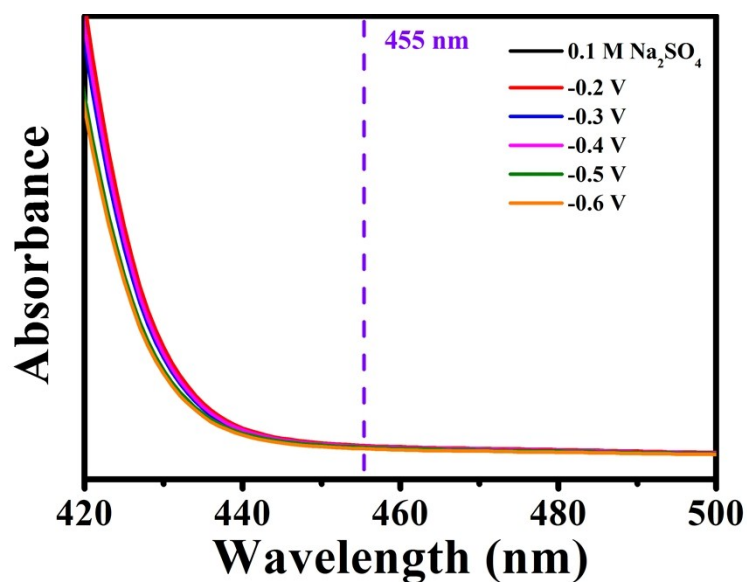

**Fig. S7** UV-vis absorption spectra of different electrolytes mixed with N<sub>2</sub>H<sub>4</sub> color reagent for 20 min at room temperature. The absorbance was determined at a wavelength of 455 nm.

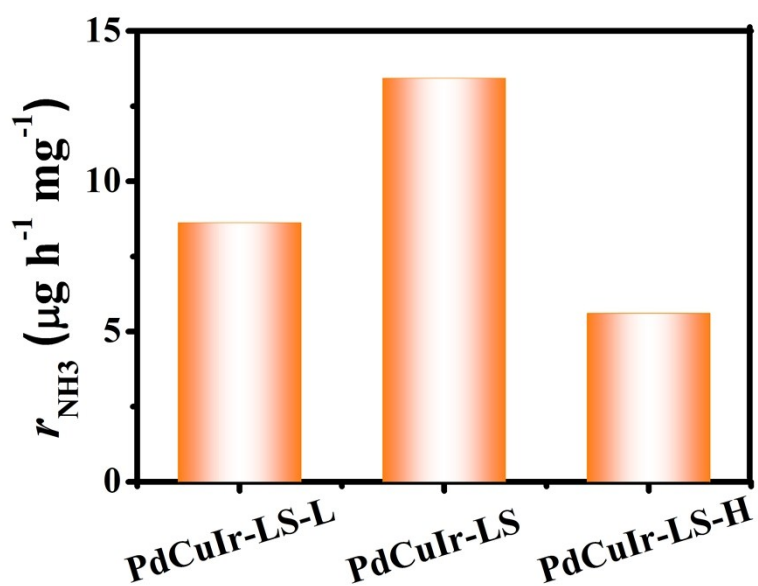

**Fig. S8** Average NH<sub>3</sub> yield of different samples at -0.3 V.

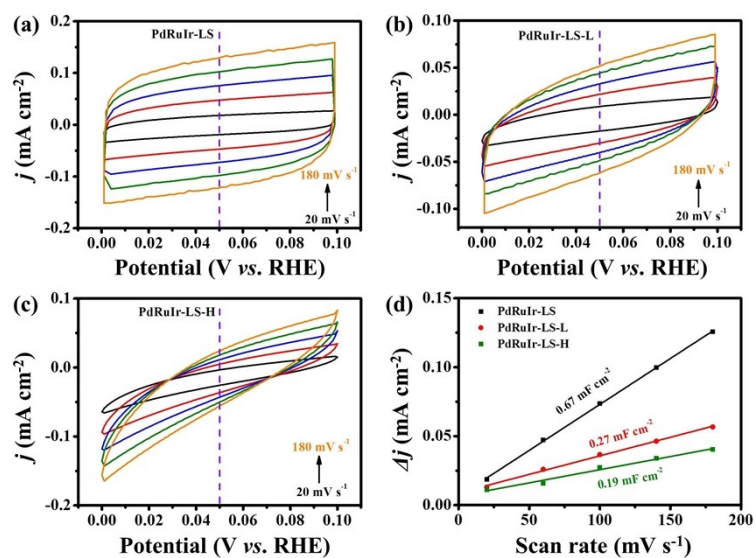

**Fig. S9** (a-c) Cyclic voltammograms of different samples at various scan rates in the potential range between 0 and 0.1 V. (d) Current density differences at 0.05 V plotted against scan rates.

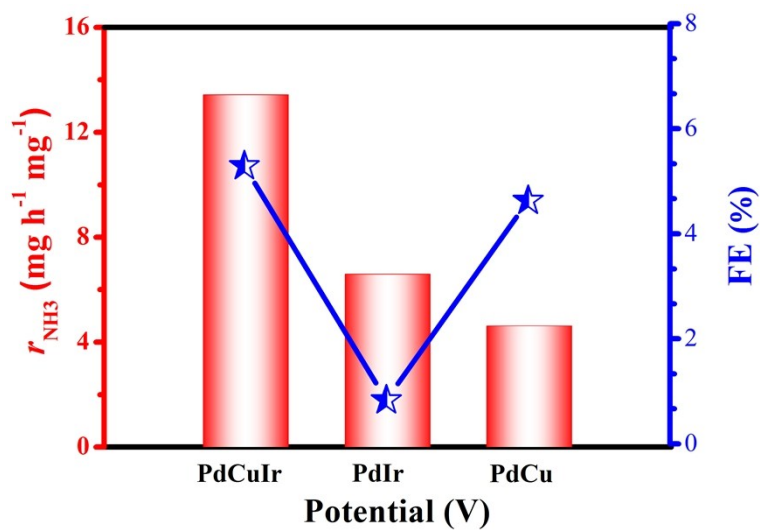

**Fig. S10** Average NH<sub>3</sub> yield and Faradaic efficiency for the different samples at -0.3 V.

**Table S1.** Comparison of the NRR performance of the PdCuIr-LS with recently reported electrocatalysts under ambient conditions.

| Electrocatalysts                         | Electrolytes                              | $r_{\text{NH}_3}$                                                                                                                    | FE            | Ref.             |
|------------------------------------------|-------------------------------------------|--------------------------------------------------------------------------------------------------------------------------------------|---------------|------------------|
| <b>PdCuIr-LS</b>                         | <b>0.1 M Na<sub>2</sub>SO<sub>4</sub></b> | <b>13.43 <math>\mu\text{g h}^{-1} \text{mg}^{-1}</math><br/>(<math>8.7 \times 10^{-11} \text{ mol s}^{-1} \text{cm}^{-2}</math>)</b> | <b>5.29%</b>  | <b>This work</b> |
| MoO <sub>3</sub>                         | 0.1 M HCl                                 | 29.43 $\mu\text{g h}^{-1} \text{mg}^{-1}$                                                                                            | 1.9%          | 1                |
| Rh nanosheet                             | 0.1 M KOH                                 | 23.9 $\mu\text{g h}^{-1} \text{mg}^{-1}$                                                                                             | 0.22%         | 2                |
| N-doped porous carbon                    | 0.05 M H <sub>2</sub> SO <sub>4</sub>     | 23.8 $\mu\text{g h}^{-1} \text{mg}^{-1}$                                                                                             | 1.42%         | 3                |
| TiO <sub>2</sub> -rGO                    | 0.1 M Na <sub>2</sub> SO <sub>4</sub>     | 15.13 $\mu\text{g h}^{-1} \text{mg}^{-1}$                                                                                            | 3.3%          | 4                |
| $\alpha$ -Au/CeO <sub>x</sub> -rGO       | 0.1 M HCl                                 | 8.31 $\mu\text{g h}^{-1} \text{mg}^{-1}$                                                                                             | 10.1%         | 5                |
| Au nanorods                              | 0.1 M KOH                                 | 6.04 $\mu\text{g h}^{-1} \text{mg}^{-1}$                                                                                             | 4%            | 6                |
| VN nanosheet array                       | 0.1 M HCl                                 | 5.6 $\mu\text{g h}^{-1} \text{mg}^{-1}_{\text{cat.}}$                                                                                | 2.25%         | 7                |
| Pd/C                                     | 0.1 M HCl                                 | $\sim 2.5 \mu\text{g h}^{-1} \text{mg}^{-1}_{\text{cat.}}$                                                                           | $\sim 1.0\%$  | 8                |
| Pd <sub>0.2</sub> Cu <sub>0.8</sub> /rGO | 0.1 M KOH                                 | 2.80 $\mu\text{g h}^{-1} \text{mg}^{-1}$                                                                                             | $\sim 0.71\%$ | 9                |
| $\gamma$ -Fe <sub>2</sub> O <sub>3</sub> | 0.1 M KOH                                 | 0.21 $\mu\text{g h}^{-1} \text{mg}^{-1}$                                                                                             | 1.9%          | 10               |
| MoS <sub>2</sub> /CC                     | 0.1 M Na <sub>2</sub> SO <sub>4</sub>     | $8.08 \times 10^{-11} \text{ mol s}^{-1} \text{cm}^{-2}$                                                                             | 1.17          | 11               |
| Fe <sub>3</sub> O <sub>4</sub> /Ti       | 0.1 M Na <sub>2</sub> SO <sub>4</sub>     | $5.6 \times 10^{-11} \text{ mol s}^{-1} \text{cm}^{-2}$                                                                              | 2.6           | 12               |
| PEBCD/C                                  | 0.5 M Li <sub>2</sub> SO <sub>4</sub>     | $2.58 \times 10^{-11} \text{ mol s}^{-1} \text{cm}^{-2}$                                                                             | 2.85          | 13               |
| Fe <sub>2</sub> O <sub>3</sub> -CNT      | KHCO <sub>3</sub>                         | $0.36 \times 10^{-11} \text{ mol s}^{-1} \text{cm}^{-2}$                                                                             | 0.15          | 14               |
| Ru/C                                     | 2 M KOH                                   | $0.34 \times 10^{-11} \text{ mol s}^{-1} \text{cm}^{-2}$                                                                             | 0.28          | 15               |

**Table S2.** The compositions of samples prepared with different metal precursors.

| <b>Samples</b> | <b>Mole ratios</b> |
|----------------|--------------------|
| PdCuIr-LS      | 10/4/1             |
| PdCuIr-LS-L    | 5/5/1              |
| PdCuIr-LS-H    | 12/3/1             |

## References

- 1 J. Han, X. Ji, X. Ren, G. Cui, L. Li, F. Xie, H. Wang, B. Li and X. Sun, *J. Mater. Chem. A*, 2018, **6**, 12974–12977.
- 2 H.-M. Liu, S.-H. Han, Y. Zhao, Y.-Y. Zhu, X.-L. Tian, J.-H. Zeng, J.-X. Jiang, B. Y. Xia and Y. Chen, *J. Mater. Chem. A*, 2018, **6**, 3211–3217.
- 3 Y. Liu, Y. Su, X. Quan, X. Fan, S. Chen, H. Yu, H. Zhao, Y. Zhang and J. Zhao, *ACS Catal.*, 2018, **8**, 1186–1191.
- 4 X. Zhang, Q. Liu, X. Shi, A. M. Asiri, Y. Luo, X. Sun and T. Li, *J. Mater. Chem. A*, 2018, **6**, 17303–17306.
- 5 S.-J. Li, D. Bao, M.-M. Shi, B.-R. Wulan, J.-M. Yan and Q. Jiang, *Adv. Mater.*, 2017, **29**, 1700001.
- 6 D. Bao, Q. Zhang, F. L. Meng, H. X. Zhong, M. M. Shi, Y. Zhang, J. M. Yan, Q. Jiang and X. B. Zhang, *Adv. Mater.*, 2017, **29**, 1604799.
- 7 R. Zhang, Y. Zhang, X. Ren, G. Cuo, A. M. Asiri, B. Zheng and X. Sun, *ACS Sustainable Chem. Eng.*, 2018, **6**, 9545–9549.
- 8 J. Wang, L. Yu, L. Hu, G. Chen, H. Xin and X. Feng, *Nat. Commun.*, 2018, **9**, 1795.
- 9 M.-M. Shi, D. Bao, S.-J. Li, B.-R. Wulan, J.-M. Yan and Q. Jiang, *Adv. Energy Mater.*, 2018, **8**, 1800124.
- 10 J. Kong, A. Lim, C. Yoon, J. H. Jang, H. C. Ham, J. Han, S. Nam, D. Kim, Y.-E. Sung, J. Choi and H. S. Park, *ACS Sustainable Chem. Eng.*, 2017, **5**, 10986–10995.
- 11 L. Zhang, X. Ji, X. Ren, Y. Ma, X. Shi, Z. Tian, A. M. Asiri, L. Chen, B. Tang and X. Sun, *Adv. Mater.*, 2018, **30**, 1800191.
- 12 Q. Liu, X. Zhang, B. Zhang, Y. Luo, G. Cui, F. Xie and X. Sun, *Nanoscale*, 2018, **10**, 14386–14389.
- 13 G. F. Chen, X. Cao, S. Wu, X. Zeng, L. X. Ding, M. Zhu and H. Wang, *J. Am. Chem. Soc.*, 2017, **139**, 9771–9774.
- 14 S. Chen, S. Perathoner, C. Ampelli, C. Mebrahtu, D. Su and G. Centi, *Angew. Chem., Int. Ed.*, 2017, **56**, 2699–2703.
- 15 V. Kordali, G. Kyriacou and C. Lambrou, *Chem. Commun.*, 2000, 1673–1674.
